# Supplementary material for: Dietary raisin intake has limited effect on gut microbiota composition in adult volunteers
Source: PubMed Central journal article supplement (PMC6404294; doi:10.1186/s12937-019-0439-1), 2019-03-07
Supplement: 12937_2019_439_MOESM2_ESM.pdf [file 12937_2019_439_MOESM2_ESM.pdf]

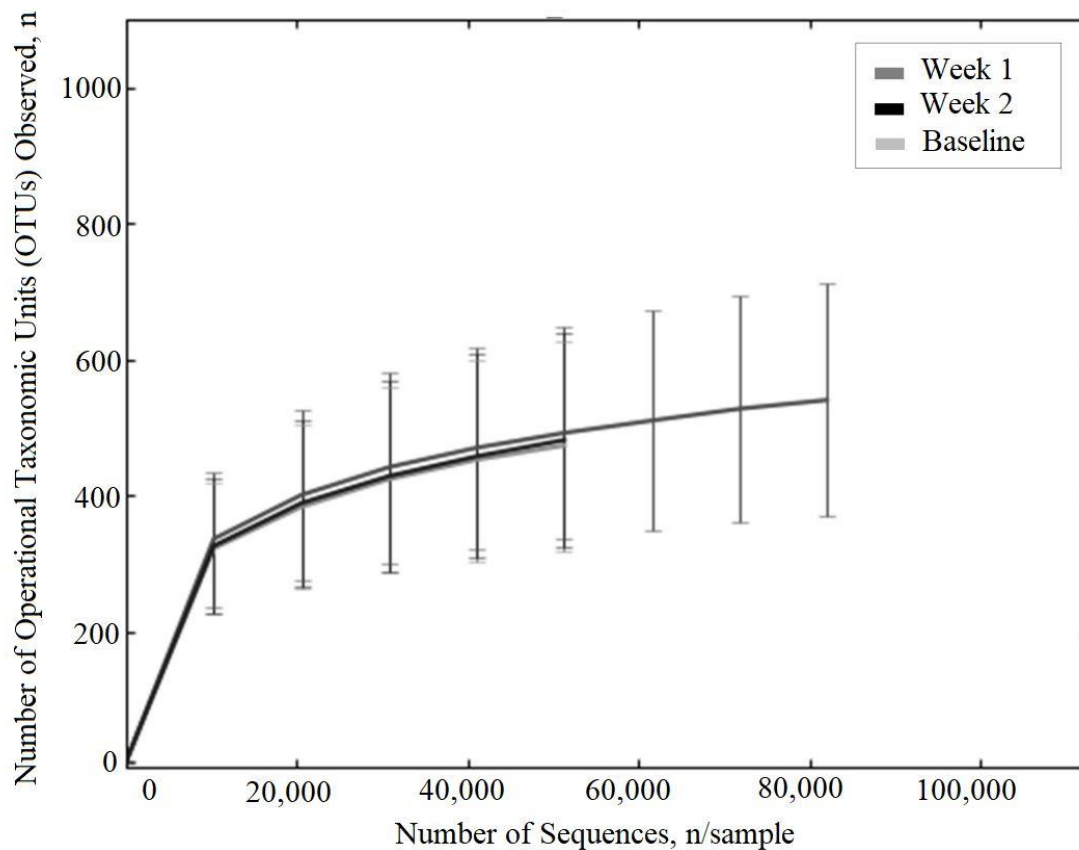

**Figure S1.** Chao1 rarefaction diversity ( $\alpha$ -diversity,  $N=13$ ). Chao diversity was calculated from the 16S rRNA gene sequence distribution at baseline, week 1 (first week of continuous raisin intake) and week 2 (second week of raisin intake).
