# Supplementary material for: Dietary raisin intake has limited effect on gut microbiota composition in adult volunteers
Source: Springer Nature journal article supplement (doi:10.1186/s12937-019-0439-1), 2019-03-07
Supplement: MOESM1 [file 25659402]

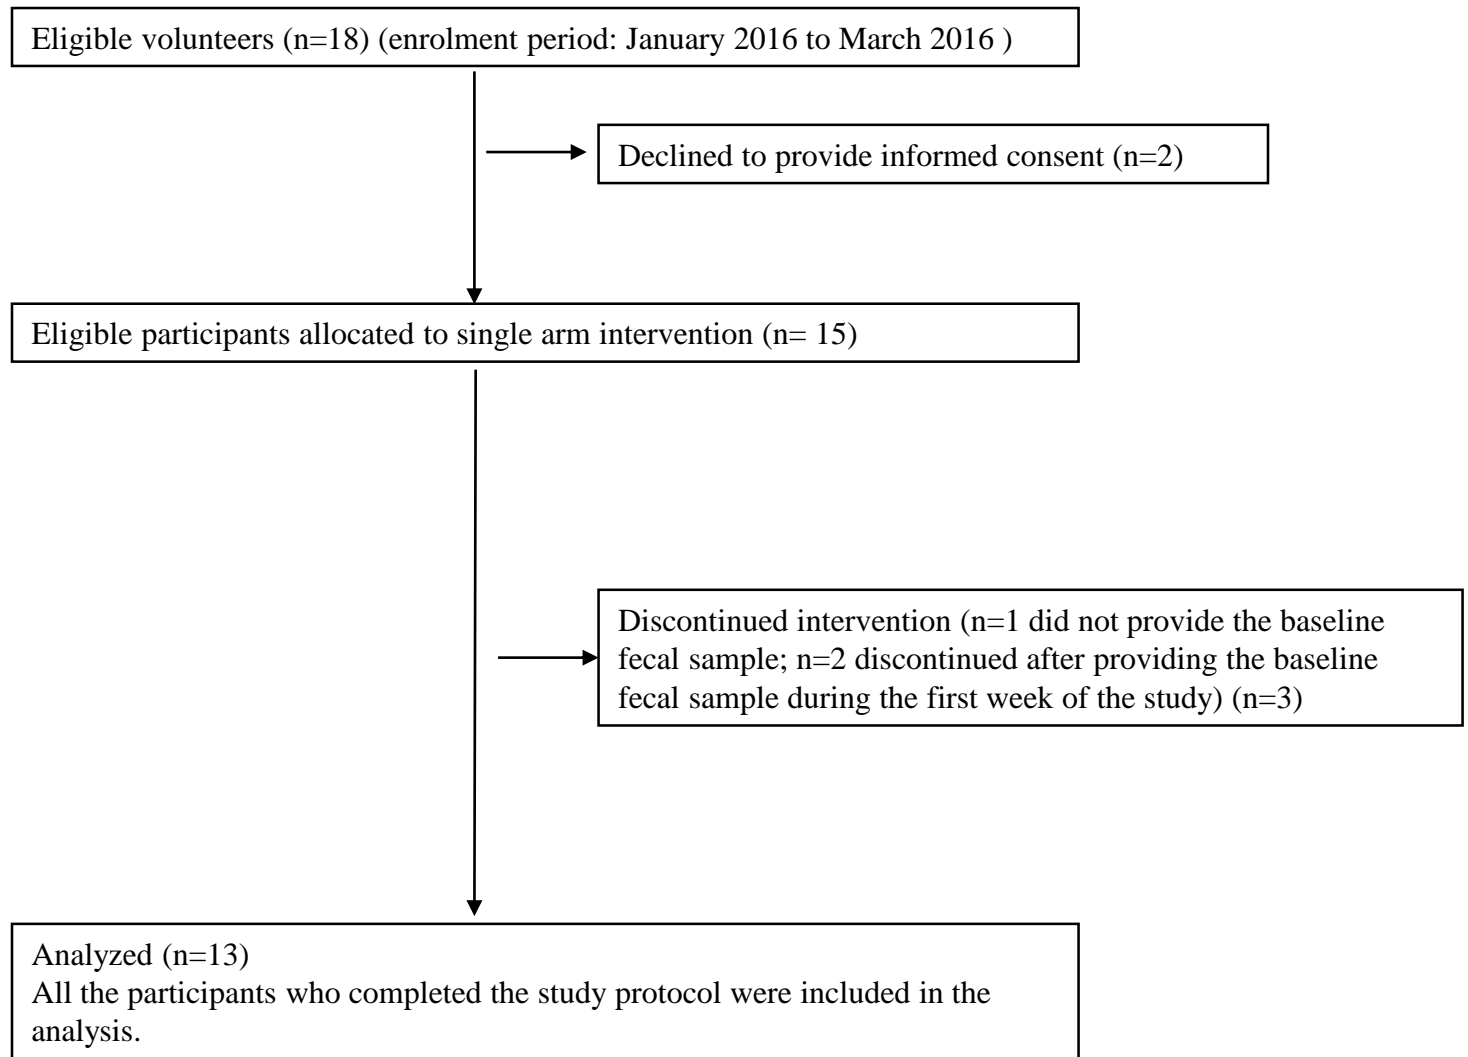

**Figure S1.** Participant flow chart.
